# Supplementary material for: Transcription through enhancers suppresses their activity in Drosophila
Source: PubMed Central journal article supplement (PMC3852481; doi:10.1186/1756-8935-6-31), 2013-09-26
Supplement: 1756-8935-6-31-S1.pdf [file 1756-8935-6-31-S1.pdf]

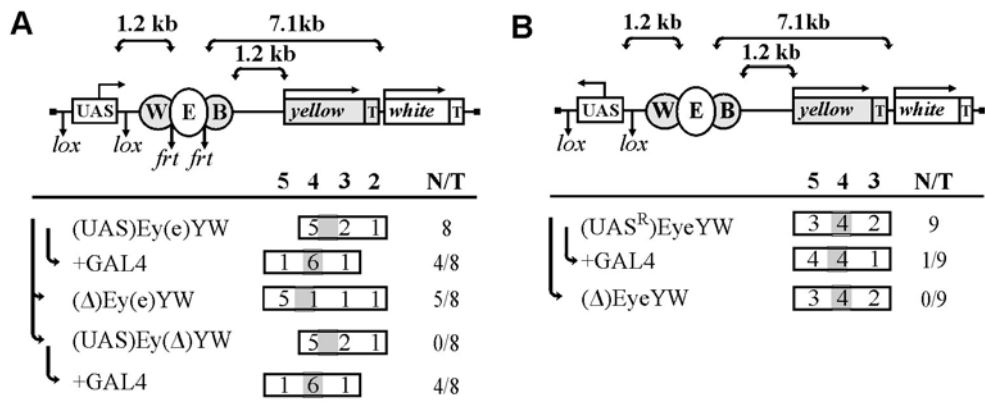

**Supplementary Figure S1** Summarized results of wing and body phenotype analysis

in (a) (UAS)Ey(e)YW and (b) (UAS<sup>R</sup>)EyeYW transgenic lines.
