# Supplementary material for: Transcription through enhancers suppresses their activity in Drosophila
Source: PubMed Central journal article supplement (PMC3852481; doi:10.1186/1756-8935-6-31), 2013-09-26
Supplement: 1756-8935-6-31-S2.pdf [file 1756-8935-6-31-S2.pdf]

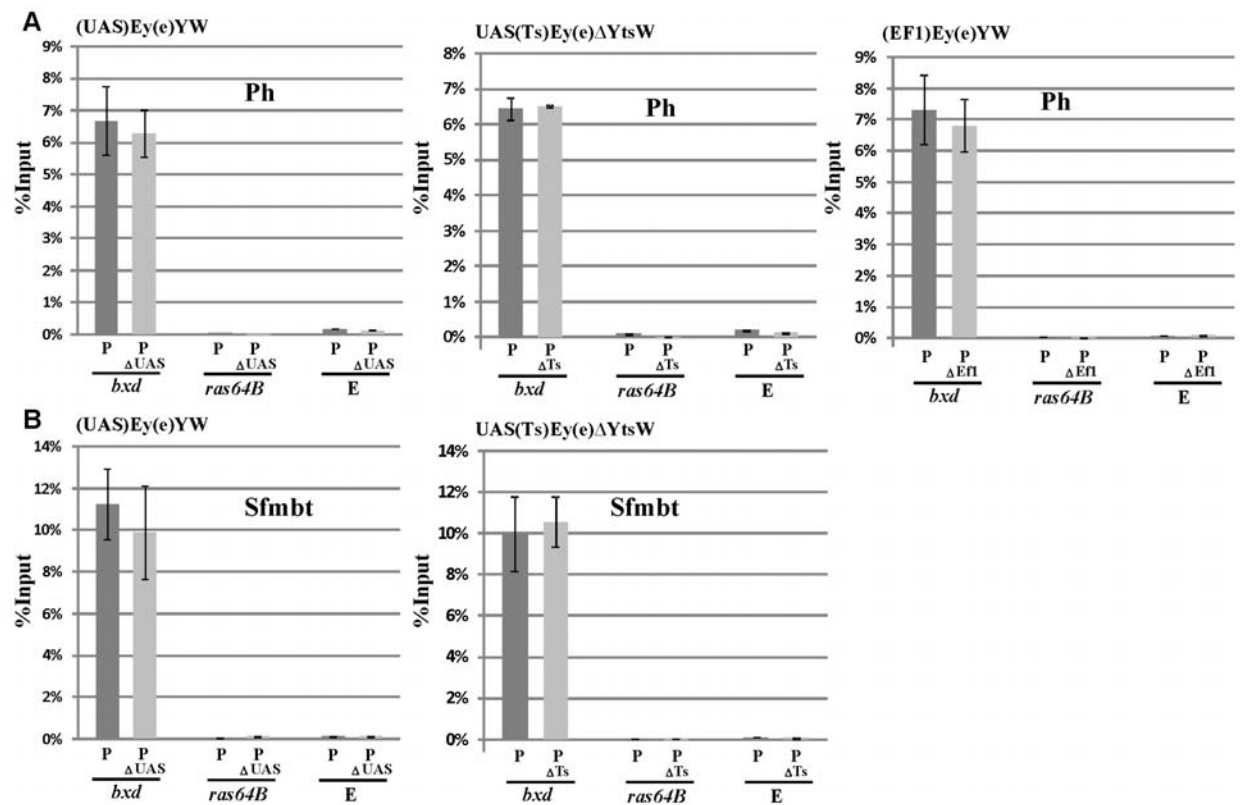

**Supplementary Figure S2** Results of ChIP with antibodies to (a) Ph and (b) Sfmbt. Diagrams summarize the results of ChIP with specific antibodies followed by real-time PCR. The ordinate shows the percentage of target sequences in the immunoprecipitated material relative to the input (10% of total crosslinked chromatin), with the genome regions for which DNA enrichment was tested being indicated on the abscissa: *bxd*, positive control; *ras64B*, negative control; E, eye enhancer of the *white* gene. “P” indicates that ChIP experiments were performed with a parental transgenic line indicated above diagram; “PΔUAS” – deletion of the UAS promoter; “PΔTs” – deletion of the 702-bp SV40 terminator; “PΔEF1” – deletion of the EF1 promoter. Vertical lines indicate standard deviations. All ChIP experiments were performed with heads of homozygous transgenic lines in the *w<sup>1118</sup>* background lacking the endogenous eye enhancer and *white* gene. Background immunoprecipitation (the average normalized level after chromatin treatment with a nonspecific antibody) was subtracted from normalized specific ChIP signals (obtained with specific antibodies) at each position.
