# Supplementary material for: Transcription through enhancers suppresses their activity in Drosophila
Source: PubMed Central journal article supplement (PMC3852481; doi:10.1186/1756-8935-6-31), 2013-09-26
Supplement: 1756-8935-6-31-S3.pdf [file 1756-8935-6-31-S3.pdf]

**Supplementary Table S1** Primers used for RT-qPCR analysis of transcripts from transgenic flies

| <b>Primer name</b>        | <b>Sequence</b>                  |
|---------------------------|----------------------------------|
| RT-1-2-forward            | 5'-AAATGATTATCGCCCGATTACCACA-3'  |
| RT-1-2-reverse            | 5'-TCAGTGCTCGAAAAAGCTTAGTGGA-3'  |
| RT-3-4-forward            | 5'-CCGATTCGAGCTCCACTCAACC-3'     |
| RT- 3-4-reverse           | 5'-GGAGCGCGCTAAGTGGTCAAAA-3'     |
| RT-5-6-forward            | 5'-ATCCAGTTGATTTTCAGGGACCA-3'    |
| RT-5-6-reverse            | 5'-TTGGCAGGTGATTTTGAGCATAAC-3'   |
| RT-7-8-forward            | 5'-GCACTGGATATCATTGAACTTATCTG-3' |
| RT-7-8-reverse            | 5'-TGGACAGAGAAGGAGGCAAACA-3'     |
| <i>white RT</i> -forward  | 5'-GCAAATGTCAGCACACGATCAT-3'     |
| <i>white RT</i> -reverse  | 5'-GTGGGCTCATCGCAGATCA-3'        |
| RT-9-10-forward           | 5'-ACTGCATTCTAGTTGTGGTTTGTCC-3'  |
| RT-9-10-reverse           | 5'-CAGCGCTGACTTTGAGTGGAAATG-3'   |
| RT-11-12-forward          | 5'-AAGCTTATCGGGGCTGCAGGAAT-3'    |
| RT-11-12-reverse          | 5'-TCAGTGCTCGAAAAAGCTTAGTGGA-3'  |
| RT-13-14-forward          | 5'-TAGATCGTCAAATAAAGTCCCTA-3'    |
| RT-13-14-reverse          | 5'-GTTTGGTATGATTTTGGCCTTC-3'     |
| <i>yellow RT</i> -forward | 5'-TGTGACCCTGATCACCTTGG-3'       |
| <i>yellowRT</i> -reverse  | 5'-TCGGGTATTCGGGAAAGCA-3'        |
| Ras64B-forward            | 5'-GAGGGATTCTGCTCGTCTTCG-3'      |
| Ras64B-reverse            | 5'-GTCGCACTTGTTACCCACCATC-3'     |
