# Supplementary material for: Transcription through enhancers suppresses their activity in Drosophila
Source: PubMed Central journal article supplement (PMC3852481; doi:10.1186/1756-8935-6-31), 2013-09-26
Supplement: 1756-8935-6-31-S4.pdf [file 1756-8935-6-31-S4.pdf]

**Supplementary Table S2** Primers used for PCR in X-ChIP experiments with DNA fragments from the genome or transgenic constructs

| <b>Primer name</b> | <b>Sequence</b>                  |
|--------------------|----------------------------------|
| pUbx- forward      | 5'-TCCTTCCTCGCGAATGAATGAACG-3'   |
| pUbx-reverse       | 5'-TCGAACGAATGTGGCACCAAATC-3'    |
| Ras64B-forward     | 5'-GAGGGATTCCTGCTCGTCTTCG-3'     |
| Ras64B-reverse     | 5'-GTCGCACTTGTTACCCACCATC-3'     |
| E- forward         | 5'-GCGACAGGCGAGTGACAATAA-3'      |
| E-reverse          | 5'-TTGGTTGAGTGGAGCTCGAATC-3'     |
| pW- forward        | 5'-GCACTGGATATCATTGAACTTATCTG-3' |
| pW- reverse        | 5'-TGGACAGAGAAGGAGGCAAACA-3'     |
| codW- forward      | 5'-GCAAATGTCAGCACACGATCAT-3'     |
| codW- reverse      | 5'-GTGGGCTCATCGCAGATCA-3'        |
| bx-d- forward      | 5'-AAGAGCAAGGCGAAAGAGAGC-3'      |
| bx-d- reverse      | 5'-CGTTTTAAGTGCGACTGAGATGG-3'    |
