# Supplementary material for: Transcription through enhancers suppresses their activity in Drosophila
Source: PubMed Central journal article supplement (PMC3852481; doi:10.1186/1756-8935-6-31), 2013-09-26
Supplement: 1756-8935-6-31-S5.pdf [file 1756-8935-6-31-S5.pdf]

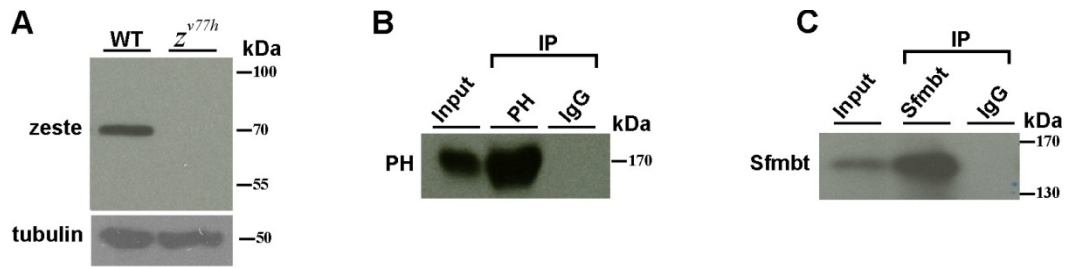

**Supplementary Figure S3.** (A) Testing of Zeste antibodies by Western blot. Protein extract was prepared from wild-type (WT) or *z<sup>v77h</sup>* larvae. Upper panel – antibodies against Zeste; lower panel – control anti-tubulin antibodies. (B) Western blot analysis of nuclear extracts (Input line), PH immunoprecipitates (PH line) and control IgG immunoprecipitates (IgG line) from Sg4 cells with antibodies against PH. (C) Western blot analysis of nuclear extracts (Input line), Sfmmt immunoprecipitates (Sfmmt line) and control IgG immunoprecipitates (IgG line) from Sg4 cells with antibodies against Sfmmt.
